# Supplementary material for: Competitive Endogenous RNA Network Activates Host Immune Response in SARS-CoV-2-, panH1N1 (A/California/07/2009)-, and H7N9 (A/Shanghai/1/2013)-Infected Cells
Source: MDPI journal article supplement (doi:10.3390/cells11030487), 2022-01-30
Supplement: s1 [file s1]

**Table S1.** Primers for H1N1, H7N9 and SARS-CoV-2 detection

| Position     | Primer Sequence(5'–3')                |
|--------------|---------------------------------------|
| H1N1-N       | Forward: GCACGGTCAGCACTTATYCTRAG      |
|              | Reverse: GTGRGCTGGGTTTTTCATTTGGTC     |
|              | Probe: CYACTGCAAGCCCATACACACAAGCAGGCA |
| H7N9-HA      | Forward: AGAAATGAAATGGCTCCTGTCAA      |
|              | Reverse: GGTTTTTCTTGTATTTTATATGACTTAG |
|              | Probe: AGATAATGCTGCATTCCCGCAGATG      |
| SARS-CoV-2-S | Forward: TGCAGGTATATGCGCTAGTTATCAG    |
|              | Reverse: CACCAAGTGACATAGTGTAGGCAAT    |
|              | Probe: TCAGACTAATTCTCCTCGGCGGGCA      |

Y and R in red are degenerate bases, Y represents T/C, R represents A/G. The primers H1N1-N could be complementary to the complete CDS regions of Influenza A virus (A/California/07/2009(H1N1)) segment 5 nucleocapsid protein (NP) gene. The length of the PCR product was 195 bp. The primers H7N9-HA could be complementary to the complete CDS regions of Influenza A virus (A/Shanghai/02/2013(H7N9)) segment 4 hemagglutinin (HA) gene, The length of the PCR product was 83 bp. The primers SARS-CoV-2-S could be complementary to the complete CDS regions of SARS-CoV-2 SARS-CoV-2 spike glycoprotein gene, the length of the product was 74 bp.

**Table S2.** Primers for qRT-PCR

| Position | Primer Sequence(5'–3')          | Tm(°C) | Product size (bp) |
|----------|---------------------------------|--------|-------------------|
| CHEK1    | Forward: CCAGCCTTCCTTCTTGGGTAT  | 60     | 415               |
|          | Reverse: AGGTCTTTACGGATGTCAACG  |        |                   |
| CCNG1    | Forward: CGGCACTTCCTAACCCTGTGT  | 60     | 722               |
|          | Reverse: TCCACAGGAGGACAGAGCCC   |        |                   |
| DDB2     | Forward: GGAGGGAACAACCTAGGCTGC  | 60     | 124               |
|          | Reverse: TGTGACCACCATTTCGGCTAC  |        |                   |
| PIGL     | Forward: GATGCAGGGGGAGTAAGTGG   | 60     | 100               |
|          | Reverse: GCACAGAGCACCCCTTTAGGT  |        |                   |
| COP1     | Forward: AGCAGCTCCAGCCTAGGCA    | 60     | 119               |
|          | Reverse: TCAAAGCAGATGGGGCATACG  |        |                   |
| PMAIP1   | Forward: GGGCTCAAGCACAGACTGCA   | 60     | 181               |
|          | Reverse: GAAGGAGTCCCCTCATGCAAG  |        |                   |
| GADD45B  | Forward: AACAAAGTCGGGCTGACTGG   | 60     | 130               |
|          | Reverse: CCCTGTGTGGGGAAAACAGT   |        |                   |
| CCNE2    | Forward: GACTGCTGCTGCCTTGTGC    | 60     | 147               |
|          | Reverse: GTCTTCAGCTTCACTGGACTAG |        |                   |
| AKT1     | Forward: TCATCGAACGCACCTTCCATG  | 60     | 168               |
|          | Reverse: CCAGGGACACCTCCATCTCTT  |        |                   |
| AKT2     | Forward: ATGTACGAGATGATGTGCGGC  | 60     | 205               |
|          | Reverse: ACCTGTGCTCCATGACCTCC   |        |                   |
| LRP6     | Forward: GTATCCCTGTGGCTTGGCGG   | 60     | 108               |
|          | Reverse: GCCCACTGGCACACTGGAAC   |        |                   |
| MAPK3    | Forward: GTCCACCCTGGAAGCCATGA   | 60     | 217               |
|          | Reverse: CTTAAGGTCGCAGGTGGTGTT  |        |                   |
| FZD3     | Forward: CCCCTGATGATCTGTCGGCATC | 60     | 108               |
|          | Reverse: TTTGGCATCAGGTGCAGAACAA |        |                   |
| MLST8    | Forward: CCGCCCCAGAACTTTGGTCT   | 60     | 91                |
|          | Reverse: CGAGGCCGAGCGTAGAGTTAT  |        |                   |
| WNT6     | Forward: AAGGCCTTTGGACGCATCC    |        |                   |

|         |                                  |    |     |
|---------|----------------------------------|----|-----|
|         | Reverse: AGAACAGGCCTGCGTGACG     | 60 | 102 |
| LRP8    | Forward: CTGCCGCTGTTATCGGGATC    | 60 | 181 |
|         | Reverse: GCAGTTCTCCCTATATGGAGCTC |    |     |
| RPS6KA6 | Forward: GGCCCTAAGGCCCAACAAGAA   | 60 | 100 |
|         | Reverse: CATGAAGGGGCTGGAAAGCCA   |    |     |
| MAPK6   | Forward: ATTGACATGTGGGCTGCAGG    | 60 | 150 |
|         | Reverse: TACGCTGAGAAGCTCCTGACG   |    |     |
| LAMTOR1 | Forward: TGCAGACTCACAGGGCATGG    | 60 | 156 |
|         | Reverse: TCACTGGCCAGCACTTGGTG    |    |     |
| GAPDH   | Forward: GATTCCACCCATGGCAAATTCC  | 60 | 93  |
|         | Reverse: TCGCTCCTGGAAGATGGTGAT   |    |     |

**Table S3-1. Top 20 differential expression circRNA of panH1N1 infection**

| Running_number   | LogFC | Pvalue      | Locus               | Best transcript |
|------------------|-------|-------------|---------------------|-----------------|
| CBT15_circR_2842 | -4.39 | 0.002013761 | 85633913-85634132   | ENST00000253458 |
| CBT15_circR_6977 | -3.25 | 0.00036949  | 18799294-18804898   | ENST00000286485 |
| CBT15_circR_5608 | -3.14 | 0.000270672 | 74174505-74201370   | ENST00000325278 |
| CBT15_circR_3479 | -3.13 | 0.000112002 | 36026899-36033837   | ENST00000357384 |
| CBT15_circR_4645 | -3.05 | 5.25983E-05 | 62905886-62914406   | ENST00000266070 |
| CBT15_circR_4035 | -3.00 | 0.00023083  | 177231888-177234271 | ENST00000397062 |
| CBT15_circR_1722 | -2.89 | 0.024447854 | 69800208-69801721   | ENST00000247833 |
| CBT15_circR_6167 | -2.82 | 0.02140074  | 149369908-149379518 | ENST00000367456 |
| CBT15_circR_3154 | -2.71 | 0.000778249 | 47664158-47668410   | ENST00000290158 |
| CBT15_circR_5964 | -2.68 | 0.023505514 | 43292473-43297166   | ENST00000325110 |
| CBT15_circR_2011 | 4.19  | 1.11128E-05 | 32090501-32117287   | ENST00000345122 |
| CBT15_circR_5670 | 4.17  | 2.70177E-07 | 1057470-1065478     | ENST00000264930 |
| CBT15_circR_1279 | 3.93  | 1.06566E-06 | 68386315-68390052   | ENST00000294304 |
| CBT15_circR_3557 | 3.86  | 8.65275E-06 | 79448781-79451816   | ENST00000253506 |
| CBT15_circR_679  | 3.81  | 4.2813E-07  | 110506934-110510596 | ENST00000369583 |
| CBT15_circR_1850 | 3.75  | 8.98507E-07 | 32517856-32527532   | ENST00000357505 |
| CBT15_circR_763  | 3.74  | 0.002787258 | 132404625-132406289 | ENST00000305233 |
| CBT15_circR_323  | 3.60  | 6.47053E-05 | 2302977-2304585     | ENST00000378536 |
| CBT15_circR_5953 | 3.55  | 1.30912E-06 | 38990948-39003622   | ENST00000296782 |
| CBT15_circR_1273 | 3.50  | 1.30815E-06 | 68347846-68348243   | ENST00000294304 |

**Table S3-2. Top 20 differential expression circRNA of H7N9 infection**

| Running_number   | LogFC | Pvalue      | Locus               | Best transcript |
|------------------|-------|-------------|---------------------|-----------------|
| CBT15_circR_7564 | -4.33 | 4.17105E-05 | 13845-13998         | ENST00000361567 |
| CBT15_circR_994  | -4.08 | 9.65834E-05 | 89751345-89762835   | ENST00000260753 |
| CBT15_circR_4207 | -3.34 | 0.000347821 | 241632916-241634079 | ENST00000407315 |
| CBT15_circR_4865 | -3.30 | 0.000532228 | 45689711-45702847   | ENST00000252934 |
| CBT15_circR_6977 | -3.07 | 0.00674829  | 18799294-18804898   | ENST00000286485 |
| CBT15_circR_5608 | -3.01 | 0.001049121 | 74174505-74201370   | ENST00000325278 |
| CBT15_circR_6771 | -3.00 | 0.023084336 | 80789305-80810701   | ENST00000265361 |
| CBT15_circR_7239 | -2.93 | 0.002365954 | 116331243-116335074 | ENST00000328252 |
| CBT15_circR_1300 | -2.91 | 0.012684471 | 70354300-70356254   | ENST00000253925 |
| CBT15_circR_5812 | -2.81 | 0.001773453 | 143054438-143057747 | ENST00000274498 |
| CBT15_circR_3388 | 4.17  | 6.42592E-05 | 81913773-81915681   | ENST00000328666 |
| CBT15_circR_5820 | 4.08  | 0.007386321 | 143399655-143400852 | ENST00000231509 |
| CBT15_circR_1942 | 3.85  | 9.15704E-05 | 102040235-102040673 | ENST00000360184 |
| CBT15_circR_4654 | 3.76  | 0.0001098   | 63789820-63790790   | ENST00000245663 |
| CBT15_circR_3816 | 3.63  | 0.007080021 | 47362475-47362693   | ENST00000328771 |
| CBT15_circR_1273 | 3.59  | 0.000138797 | 68347846-68348243   | ENST00000294304 |
| CBT15_circR_2676 | 3.49  | 0.012859288 | 4466152-4469465     | ENST00000283429 |
| CBT15_circR_2864 | 3.40  | 0.012474985 | 89098590-89102759   | ENST00000317447 |
| CBT15_circR_5953 | 3.33  | 0.000219072 | 38990948-39003622   | ENST00000296782 |
| CBT15_circR_2662 | 3.20  | 0.034070486 | 346147-347106       | ENST00000262320 |

**Table S3-3. Top 20 differential expression circRNA of SARS-CoV-2 infection**

| Running_number   | LogFC  | Pvalue      | Locus               | Best transcript |
|------------------|--------|-------------|---------------------|-----------------|
| CBT15_circR_2570 | -3.44  | 2.23987E-06 | 18797924-18798834   | ENST00000567078 |
| CBT15_circR_6977 | -3.40  | 3.01581E-06 | 18799294-18804898   | ENST00000286485 |
| CBT15_circR_4556 | -3.146 | 1.94959E-05 | 3907925-3912634     | ENST00000316562 |
| CBT15_circR_5608 | -2.89  | 0.000101897 | 74174505-74201370   | ENST00000325278 |
| CBT15_circR_714  | -2.84  | 0.000143471 | 11997671-12014184   | ENST00000356352 |
| CBT15_circR_4645 | -2.81  | 0.000171291 | 62905886-62914406   | ENST00000266070 |
| CBT15_circR_6617 | -2.80  | 0.002458721 | 24623662-24668660   | ENST00000432190 |
| CBT15_circR_911  | -2.76  | 0.000230186 | 68788149-68788328   | ENST00000265872 |
| CBT15_circR_4136 | -2.69  | 0.004307819 | 223998114-224001922 | ENST00000258405 |
| CBT15_circR_6092 | -2.67  | 0.000378561 | 94643272-94654752   | ENST00000265140 |
| CBT15_circR_323  | 3.60   | 6.85732E-07 | 2302977-2304585     | ENST00000378536 |
| CBT15_circR_7576 | 3.39   | 3.64453E-06 | 3597-3789           | ENST00000361390 |
| CBT15_circR_1723 | 3.28   | 7.97443E-06 | 70278131-70311017   | ENST00000229195 |
| CBT15_circR_7194 | 2.95   | 0.001644986 | 110941420-110973558 | ENST00000374430 |
| CBT15_circR_5953 | 2.90   | 0.000102672 | 38990948-39003622   | ENST00000296782 |
| CBT15_circR_5988 | 2.89   | 0.001915148 | 58988492-58993465   | ENST00000309641 |
| CBT15_circR_6324 | 2.80   | 0.004827675 | 47253255-47286595   | ENST00000296861 |
| CBT15_circR_5201 | 2.79   | 0.003171312 | 31576395-31580096   | ENST00000295770 |
| CBT15_circR_5965 | 2.72   | 0.006261545 | 43292473-43298975   | ENST00000325110 |
| CBT15_circR_3084 | 2.66   | 0.007415919 | 39708320-39710481   | ENST00000269571 |

**Table S4-1. Top 20 differential expression miRNA of panH1N1 infection**

| Running_number   | LogFC | Pvalue      |
|------------------|-------|-------------|
| hsa-miR-223-3p   | 5.76  | 0.002719401 |
| hsa-miR-133a-5p  | 5.76  | 0.001197401 |
| hsa-miR-133a-3p  | 5.56  | 0.00155117  |
| hsa-miR-133b     | 5.40  | 0.003279399 |
| hsa-miR-451a     | 5.31  | 2.68739E-08 |
| hsa-miR-4470     | 5.06  | 0.005459552 |
| hsa-miR-95-5p    | 4.78  | 0.015537353 |
| hsa-miR-3189-5p  | 4.31  | 0.019132269 |
| hsa-miR-4688     | 4.29  | 0.029102866 |
| hsa-miR-450b-3p  | 4.27  | 0.049894132 |
| hsa-miR-302a-5p  | -5.02 | 0.009393562 |
| hsa-miR-3170     | -4.81 | 0.012095588 |
| hsa-miR-4759     | -4.27 | 0.00010251  |
| hsa-miR-7704     | -3.89 | 5.06841E-19 |
| hsa-miR-4508     | -3.46 | 3.70807E-11 |
| hsa-miR-122-5p   | -3.34 | 2.47599E-06 |
| hsa-miR-302b-3p  | -3.28 | 4.5216E-05  |
| hsa-miR-4516     | -3.14 | 0.005314758 |
| hsa-miR-1915-3p  | -3.03 | 0.015642957 |
| hsa-miR-3150a-3p | -3.00 | 0.046223505 |

**Table S4-2. Top 20 differential expression miRNA of H7N9 infection**

| Running_number   | LogFC | Pvalue      |
|------------------|-------|-------------|
| hsa-miR-133a-3p  | 6.82  | 5.64939E-06 |
| hsa-miR-133b     | 6.80  | 1.07166E-06 |
| hsa-miR-133a-5p  | 6.77  | 7.02634E-06 |
| hsa-miR-4470     | 5.13  | 0.004638365 |
| hsa-miR-202-5p   | 4.32  | 0.019361908 |
| hsa-miR-450b-3p  | 4.18  | 0.040332394 |
| hsa-miR-6777-5p  | 4.16  | 0.035002985 |
| hsa-miR-887-3p   | 4.14  | 0.047613308 |
| hsa-miR-190a-3p  | 4.06  | 0.049030713 |
| hsa-miR-3189-5p  | 4.05  | 0.042520577 |
| hsa-miR-4516     | -5.38 | 0.000741682 |
| hsa-miR-4508     | -4.73 | 1.52392E-14 |
| hsa-miR-1915-3p  | -4.56 | 0.015649343 |
| hsa-miR-7704     | -3.62 | 9.62166E-18 |
| hsa-miR-302b-3p  | -3.27 | 3.04959E-05 |
| hsa-miR-548ap-5p | -2.83 | 0.006319475 |
| hsa-miR-6805-5p  | -2.75 | 0.04893301  |
| hsa-miR-6827-5p  | -2.43 | 0.004919505 |
| hsa-miR-122-5p   | -2.41 | 0.00015413  |
| hsa-miR-4797-3p  | -2.35 | 0.000271869 |



**Table S4-3. Top 20 differential expression miRNA of SARS-CoV-2 infection**

| Running_number   | LogFC | Pvalue      |
|------------------|-------|-------------|
| hsa-miR-4470     | 4.06  | 0.047292463 |
| hsa-miR-3940-5p  | 3.30  | 0.007161687 |
| hsa-miR-4733-5p  | 3.14  | 0.014630097 |
| hsa-miR-4684-5p  | 2.81  | 0.047571789 |
| hsa-miR-676-3p   | 2.22  | 0.024546087 |
| hsa-miR-135b-3p  | 2.04  | 0.023385746 |
| hsa-miR-4687-3p  | 1.88  | 0.043642683 |
| hsa-miR-4759     | 1.86  | 0.00067405  |
| hsa-miR-2277-3p  | 1.85  | 0.013575979 |
| hsa-miR-4516     | 1.68  | 0.003211578 |
| hsa-miR-143-5p   | -4.66 | 0.020672182 |
| hsa-miR-6827-5p  | -4.59 | 0.004097695 |
| hsa-miR-206      | -4.25 | 0.045097741 |
| hsa-miR-548ap-5p | -2.96 | 0.012770027 |
| hsa-miR-3605-5p  | -2.39 | 0.04516632  |
| hsa-miR-143-3p   | -2.20 | 0.00431736  |
| hsa-miR-302b-3p  | -2.03 | 0.014930239 |
| hsa-miR-4797-3p  | -2.03 | 0.014080794 |
| hsa-miR-4684-3p  | -1.87 | 0.047314347 |
| hsa-miR-5697     | -1.86 | 0.038594387 |

**Table S5-1. Top 20 differential expression lncRNA of panH1N1 infection**

| Running_number  | LogFC | Pvalue      | Locus                     |
|-----------------|-------|-------------|---------------------------|
| NONHSAG097327.1 | 5.38  | 1.9273E-08  | 7:-:128112587-128112824   |
| NONHSAG097813.1 | 4.65  | 3.74267E-07 | 7+:38702151-38703318      |
| NONHSAG097538.1 | 4.62  | 3.06431E-07 | 7+:2670534-2671572        |
| NONHSAG048732.2 | 4.55  | 3.33463E-06 | 7+:128112042-128118723    |
| NONHSAG099846.1 | 4.36  | 5.25414E-07 | 8:-:143895581-143895801   |
| NONHSAG071826.1 | 4.24  | 4.97516E-06 | 16+:75136966-75229739     |
| NONHSAG109470.1 | 4.15  | 1.32592E-05 | 19:-:2294742-2298864      |
| NONHSAG061959.1 | 4.11  | 3.16619E-05 | 10+:33126643-33127435     |
| NONHSAG108586.1 | 4.09  | 1.42631E-05 | 17+:9895483-9896447       |
| NONHSAG109479.1 | 3.91  | 5.61783E-06 | 19:-:4518953-4519531      |
| NONHSAG109088.1 | -4.70 | 2.41965E-08 | 18+:50374996-50383284     |
| ENSG00000236027 | -4.68 | 5.88463E-07 | 11+:125788111-125791600   |
| NONHSAG084376.1 | -4.36 | 2.38739E-05 | KI270733.1+:122273-135645 |
| NONHSAG098705.1 | -4.33 | 2.44868E-06 | 8+:25470827-25471632      |
| ENSG00000203811 | -4.08 | 2.0052E-07  | 1:-:149839538-149841193   |
| NONHSAG112126.1 | -4.04 | 1.0386E-05  | 4:-:112604559-112604813   |
| NONHSAG053901.2 | -3.99 | 0.000577934 | GL000220.1+:97129-156152  |
| NONHSAG063717.1 | -3.99 | 9.76731E-08 | 11:-:125846168-125860797  |
| ENSG00000250536 | -3.96 | 2.12323E-08 | 1:-:214605470-214608840   |
| NONHSAG049792.2 | -3.95 | 3.1172E-05  | 8+:25504412-25504978      |

**Table S5-2. Top 20 differential expression lncRNA of H7N9 infection**

| Running_number  | LogFC | Pvalue      | Locus                   |
|-----------------|-------|-------------|-------------------------|
| NONHSAG076212.1 | 5.93  | 0.001604567 | 19:+:48887932-48891725  |
| ENSG00000240023 | 5.62  | 1.80391E-07 | 14:-:35388121-35389069  |
| NONHSAG090683.2 | 5.60  | 5.37908E-07 | 5:+:171494734-171502854 |
| NONHSAG073924.1 | 5.51  | 1.48491E-05 | 17:+:1325377-1326270    |
| ENSG00000134321 | 5.45  | 1.045E-06   | 2:+:6865806-6898239     |
| ENSG00000204252 | 5.44  | 5.13171E-06 | 6:-:33004178-33009612   |
| ENSG00000169327 | 5.43  | 1.19349E-06 | 14:-:21148370-21159060  |
| NONHSAG018621.3 | 5.39  | 0.000861138 | 16:-:11818293-11828845  |
| ENSG00000182393 | 5.07  | 3.86654E-06 | 19:+:39296325-39298673  |
| NONHSAG085240.1 | 5.05  | 3.04629E-07 | 3:+:185890459-185892642 |
| NONHSAG049792.2 | -4.88 | 1.08132E-05 | 8:+:25504412-25504978   |
| NONHSAG098705.1 | -4.87 | 2.0475E-05  | 8:+:25470827-25471632   |
| ENSG00000163009 | -4.61 | 0.000238262 | 2:+:10141382-10211725   |
| NONHSAG023735.2 | -4.58 | 3.08649E-05 | 18:+:39647396-39649594  |
| NONHSAG073285.1 | -4.52 | 6.38362E-06 | 17:+:61849872-61850104  |
| ENSG00000212432 | -4.49 | 7.58154E-06 | 12:+:9445058-9445205    |
| NONHSAG037014.2 | -4.49 | 6.65993E-06 | 3:+:193996877-193999474 |
| NONHSAG111936.1 | -4.48 | 1.95545E-05 | 4:+:177309837-177319095 |
| NONHSAG109708.1 | -4.46 | 0.000251946 | 2:+:10141382-10211725   |
| NONHSAG029753.2 | -4.34 | 0.00083981  | 2:+:168860204-168864856 |

**Table S5-3. Top 20 differential expression lncRNA of SARS-CoV-2 infection**

| Running_number  | LogFC | Pvalue      | Locus                    |
|-----------------|-------|-------------|--------------------------|
| NONHSAG105679.1 | 3.20  | 0.000249802 | 1:-:219247401-219247863  |
| ENSG00000199482 | 3.09  | 0.000327814 | 16:+:10496272-10496374   |
| NONHSAG024482.2 | 3.06  | 0.000278631 | 19:-:3544183-3557569     |
| NONHSAG111319.1 | 3.05  | 0.000288668 | 3:+:126476241-126477394  |
| NONHSAG041097.2 | 3.03  | 0.000710579 | 5:-:97223371-97227957    |
| NONHSAG003647.2 | 3.02  | 0.000475728 | 1:+:181236388-181238604  |
| NONHSAG081469.1 | 2.98  | 0.000422962 | 20:+:32564992-32608893   |
| NONHSAG090209.1 | 2.98  | 0.000381387 | 5:+:61198337-61217927    |
| NONHSAG096636.1 | 2.95  | 0.000667622 | 7:+:125043037-125045026  |
| NONHSAG036027.2 | 2.93  | 0.000802537 | 3:-:128843564-128844404  |
| NONHSAG080416.1 | -3.23 | 8.11765E-05 | 2:+:121771189-121772218  |
| NONHSAG109525.1 | -3.16 | 0.000115407 | 19:-:18122129-18123280   |
| ENSG00000236675 | -3.16 | 2.26469E-06 | 1:+:155230975-155234325  |
| NONHSAG111399.1 | -3.05 | 0.000153195 | 3:+:183687274-183687959  |
| NONHSAG105222.1 | -2.95 | 0.000580575 | 1:+:235432985-235433231  |
| NONHSAG055783.3 | -2.93 | 0.000561968 | Y:-:12661090-12662233    |
| NONHSAG109911.1 | -2.89 | 0.000545935 | 2:+:132347522-132347846  |
| NONHSAG106486.1 | -2.88 | 0.000652249 | 11:-:46594322-46595445   |
| NONHSAG014134.2 | -2.88 | 0.000585138 | 13:-:106557048-106562044 |
| NONHSAG023646.2 | -2.87 | 0.000435489 | 18:+:31884858-31885143   |

**Table S6. The sequence of LncRNA34087.27, IRF1-3'UTR and miR-302b-3p.**

**LncRNA34087.27 (Chromosome 14:+:73851844-73932511)**

CATCCCTCCTGGATCTGGCGGGCCCCGGGAGCGGCCAGTCTGAAGCCCTGCGGCTTTGG  
CCCTTCCCCTCGCGGGTTTTTAGGGGCGATGTTCTTGCTCCTTTGCTTGGTTTTGGGGG  
TAGGGATATAGGAACAGACTGTCCTGAGAAAGCCAGAGTCAGCGAGTCCCCGGGGCG  
GGGGCTCTTGGACTGCACCCGCAGCCGGGGCCTGCCTACGGACCTTGGGGCCTTATTT  
CTGAGGCCTTTGTGGTGTGGGGTAGAGGATGCCAGGAGGCCTTGCCCTGAATGTTTCA  
GTCCAGAGCTACCCTCTCCTTTCATACCACTTACTTTCTGGGTTTGGAAAAGGGACAGC  
TGCCTACTCGGCTGGGCTGGGTCGCCCCGTTTCTCCTTTGCCTGTCAGTTCGGGGGGCA  
GGAGTGTGTGGATTGTTTACGGCCTTCATACATTTCTGTGTCGAATTTATTTTCTGAAGTT  
TCTCAAGATAATCCAATTTATTAAAGTTTATCCCACTTGATCATGAGGCTCAGAAATGCA  
TTTAGGCACCATTTGGAAGTTAAATATTATTAAGTTGGGACTTAAGAATTAGTACTTAGG  
TTGGAACGAAGGTCAACGCAGCATATTTGCAATAAATAAAAAACATTTGGAAATAAAG  
TCGGGCATTTTGTTAGGGAGTGAGAAATTGCACTTGGTTTTTTCTTAGTGTGGTGCAGA  
GTAAAAGACAATAAGTAGCAGTCAGAAGTTTAAAGTTCTAGTTTTTTACGTTTTTGCA  
TCTAAGTAGATGTCTAATTTTTTGCAAGTTGCTGAATCTCTAGCTCTGGGGAGTTTTTCT  
GTAAACGAAGGGGTTTACCTTTAGGGCTATGACAATTTTTCCGAGGCACTGAACTTTGA  
GTAGAAGTGACATAAGCATTCTTTGTTTTGGAAAGATAACTGAATGGCTGCATAAAG  
GATGTATTGGAAAGAGGAATTTTAAACGCGGGGTGACCAGTTAGAGGCCTGTTTTAATA  
GTATAGTAGAAAGTTACTGAGAGACCTAAACAGGGCATTACAGTAGGGAACAGAGAAC  
ATTCTGGGAACAGAGAATCACGGGAATTATTTAAAAATGGAGAATGAGAGAGATTTAA  
AGACCTAGAATTTGCAGCTGAGTGGGAGGAAGATTGGGCGATCATTGAAATAGGTAAT  
ACAAGAAGAACAGGTTTGGTAAGGAAGATAATAATCTGGATTTTGGACATTGTTAGGTT  
TGAGATGCTGTTGGATATACATGTGGAGATACCTAGCAAGCAGTTAGAAATGAAGGTTT  
GGAGTTCAGAAAGAGATGACTAGAGAAAAATGTAGGTATCATTGTAGTGTCAATTCATTC  
ATTATACAAATATTTAGTACCTACCAGTTGCTTACTGGGAAGCTTGATGGAAGCCCTTT  
AAGCTCATAGTAAACACATTAGAAGTGGAAGTGACCGTTAATGGGCACAGGGTTTTCC  
TTGTGAGGTGATGAAATATTGTAAAATTGATCGTGGTTCTGCTTGTACAACTCTGAATG  
AACTAAAGATATTTTAATTGTACTCTTTAAATGAGTCAATAGTATGGTATGTGAACGATAT  
CTTAGTGAACTAATTTTTTAAAAAAGATTTACATTGCAGTTTTGGAAATCTGTTGAGTA  
AGGAATTGGGAATAGGAATGTTTAATTGTGTATTTGCCGTTACACCTATAGCTAATGTAC  
ATAGTACGTTGCTCTGTAAAGATGAGATCCCCACAGTACACTTGATAAGATACTGAGT  
GCTCTAGTACAAATCTTTTGAGTTCAGTTGCATATCTTAATGCATCCTGCTATTTTTTAT  
TTTATTCATACCGTACACATACAAATCATAAACTTGGACACAAAAATTGTATGGTAGTAC  
TTAGTTATAATATGAATACCCAGTGCTTGAGAAAATGCTCGTGTTAATTTTTTAAAGATTAT  
TGAAGTGAAAACACTGAAATAAAAAGATGTCATAGATAACATAAAAAGGACAGTAAAT  
AGTTGTCTGGTTCCCTCAGAGATTTTACAATCCTGGAATCTCAAAGTTGGAGGAACCTTA  
AGGATGACTTAAACAACAAACATCTGATAATTTCTTGGCTTGTTAAGACAAGCTGGAAT  
TGGGGAAGAGGAATTCTTGTTTTTTTTGAGACAGCCTCCATTTGTTACCCAGGCTGGAG  
TGCAGTGGCGTGATCACTGTTCAGTGCAGCCTCGATCTCCTGGGCTAAAGCAATCCTCC

TACTCAGCCTCCCTAGTAGCTAGGACCACAGGCATGTGCCACCATGTGATGCTAATTGA  
AAAATTTTTTTTTGTAGAAATAGAGTCTCACTGGCTGAGATCGCGCCACTGCACTCCAG  
CCTGCGTGACAGAGCGAGACTCAGTCTCAAAAAAAAAAAAAAAAAAAAAAGAAATA  
GGGTCTCACTGTGTTGCCTAGGCTGAGAAAAGGAATTCTTAGGCCATGGAGATTCAGG  
GTCAAACCTAGAGAGATGTAATCACTATTCACGCCAATGATTTCTGCATACTTCTGGTGT  
GGGTGGGAGTCCTGGCTTTGCAACTTAATAACTTGGTAATTAAGTAATATACTGAGCCT  
TGGTTCCTTCCTCTCTAAATAGAGGGATGGATAAACCATATGAAACTGTTGCAGTGCTT  
GAATAAGAAAAATATGTGTGGAAGAAAAGTCAGGGATTTATGATACTTTATGTGGGAAA  
CTTGGAAGGAGCATTTCATTTATATCTTGTAATGGTTAGTTTTTTTTTTTTTCTCG  
ACACAGAGTCTTGCTCTGTGCGCCGGGCTGGAGTACAGTGGAGCGATCTCGGCTCACT  
GCAATCTCCATCTCCTAGGTCCAAGCGATTCCCCTACCTCAGCCTCCTGAGTAGCTGGG  
TCTGCAGGCACATGCCACCACACCTAGCTAATTTTTGTATTTTAGTTGAGACGGAGTT  
GCACCATGTTGGCCAGGATGGTCTCAATCTCCTGACCTTGTGTTCCGCCTGCCTCGGCC  
TCCCAAATGCTGGGATTACAGGCGTGAGCCACTGCTCCCGGCCTAAATGGTTACTTTT  
TTACAATGAAAAATGAGGATTTCAAGTAGCTTAGAAAGAGAGAGGGAGAAACCAACA  
GGACAAAAAACATTTATTCAGTTACTTTTTTTTTTTTTTGAGATGGAGTCTTGCTCTGT  
CGCCCAGGCTGGAGTACAGTGACGCGAGTCTCAGCTCACTGCAACCTCCATCTCTCGGG  
TTCAAGCGATTCTCCTGCCACAGCCTCCCGAGTAGCTGGGATTACAGGCACCCGCCAC  
ATGCCCGGCTAATTTTTGTATTTTAGTAGAGACGGGGTTTCGCCATATTGGCCAGGCTG  
GTCTTGAACCTCCTGACCTCAGGTGACCCACCCGCCTCGGCCTCCCAAAGTGCTGGGTT  
TACAGGCGTGAGCCACCGTGCCAGCCTAAGTGCCCTCTTTGTAAAGTCTGTCTTGTTT  
TACCTTTCCACACTACCTGGTATTAATTGGAACTTTAAAGTACCCATTGATTGAAAATA  
TACCCATCCTGGATACATTTTACACTGTATGATTATTTGTAATAGTGCTCCCAATTTTAGT  
AACAATTGTACAAAATAAAATGGACTCACATTCCAAAATCCTGAAAAGAACTAAGCT  
ATAAGAAAGTAAGAATTTAAGTTATAGGGAGTGCTGGGCGCAGTGGCTCACACCTGT  
AATCTCAGCACTTTGGGAGGCCACGGCAGGCGGATCACCTGAAGTTGGGAGTTTCGAG  
ACCAGCCTGACCAACATGGAGAAACCGTCTCTACTAAAAATACAAAATTAGCCAGGTG  
TGGTGTCTCATGCCTGTAATCCCAGCTACTCCAGGAGTCTGAGGCAGAATTGCTTGAAC  
CTGGGAGGCAGAGGTTGTGGTGAGCTGAGATCGTGCCATTGTGCTCCAGCCTGGGCA  
ACAAGAGCAAACTCCATCTCTAAATAAATAAATAAAAGAGAGAGAACAGCCGCATCA  
GGGTCCTGAGAGCACTACCTTTGGGAAACGCTCTTCAAATTTTAACTTTTTTTTTTTA  
AATGTAATTTTAAAAATTATCAAAACAATATGGTTGCCTTTTAGAAATATTGGAAAATTG  
AGAAAAGAAAATTAAGTCACACCAGCCTACCACACGGTATAGCTACGGTCATAGCTGT  
ATGAATCTCCTTTTACTTTTTCTGATGCTTATTATAACTAGTTTTAATAATAGCAAGTATAT  
AATTTGTATTTTATTTTATAATTTAACATGTCAGTCACTTGTTGTTGCATTGTCTTCATA  
GCATTTGTTTGTGGTTTGTTTTTTGAGATAGAGTCTTGCTCTGTGCGCCAGGCTGGAG  
TGCAGTGGTCTGACCTTGGCTCACTGCAACCTCCACCTCCTGGGTTCAAGGGATTCTC  
CTGCCTCAGTCTCCCGAGTAGCTGGGATTACAGGTGCCTGCGACCATGCTCAGCTAATT  
TTTGTATTTTAGTAGAGAGGGGGTTTCACTATGTTGGCCAGGCTGGTCTCGAACTATT  
GACCTCAAGTGATCCACCTGCTTCAGCCTATCAAAGTGCTGGGATTACAGTTGTAAGCC  
ACCACACCCAACCCTTCACAGCATATTTGAAGTGACAGTGCCATATTTAATCAACCAT

TCCCTAATTGGGGGTGTGTGTGTGTGTATACATTGCTTCCAGTTGTTTATTACATAGGAT  
AAGACGGACATCTTTGGACATAGCTCTATCCATATTTAAGATAGTTTTTTAGATTATTAGA  
GGTTGAAATACTGCATCAAAGCGTAGTATTTTTATGGGTTTTGATGCCTGTTGAGCTTGT  
TGTATTTTAAAAGAAGTGTTCGGTTTTGAATTCTTTATTTGCTTGCTTGTTGTGATTTTTT  
TTGTATATGTAAAGAAGTGTCTTTATGTACCTGTGTTTTCCCACTGCTCTTAATGCCCCC  
TCTCTCTTTTTTACCCCTATTCTAGGTTACATTGATTACCCACCTAGTACAACATCTTACG  
GGAAGAGCATAGTATTTCCCTAGAGGAATATGAACATAACAGGAAGGTATCATTGGCTCT  
GAATTAAATTTGAACTTGTCCCCTGAATAGCTACAGGTTTTGGAAGCTGAATCAATGTT  
ATCAGATGAGTTAGAATCCAAACCAGAGGTGAGCCCAGTCAGCTTGTTTCCTTTTCTTT  
TGGTGGGCTATATTTCAAAGTTTATCTTCAGTTTAGGGGGTCAGCAAACTTTTCTTTAA  
TGGGCCAGATAATAAATATTTTAGGTTTTTTAAGCTATATGGTTTTGATTGTTACTATTTTT  
TCAAAGATTTAAAAATTATATTTTTTGTGATTGTTTTTATATCTGTTTTTCAGTATATGTGA  
AATCATACATTTAGATAATGTAATAAAATCTTATAAATAAAAAATATATGTTTATGTATAAAT  
ATATACATAAATATGAGATACATGTGATGTATAGGTGTATAAGTATATAAATATTTACTACT  
ACAAATTCCTTTGTTTATTTTATATATCTGTAAGTATTTTCTTCTAAATGTGATTGGGG  
ATTTAAACATTTTTTGTGTTCACTTTTCTTACTTTAAATTTAGCACATCTGTGTTGCAGA  
GTGGTCACTGAATTTGGAATCAGATTACTTAAATTTGAGGATTGGCATTGCTCCTAACTA  
GTCTTGACCTTAGACAAGTCACTTAATGTCTTCAATTTTATTCCTCAGCTGTAAAATA  
TGCCTTAAGTTTGGGTGCGGTGGCTCACGCCTGTAATCCCAGCACTTTGGGAGGCCGA  
GGCAGGTGGATCATGAGGTCAGGAGTTCAAGACCATCCTGCCTAACATGGTGAAACCC  
TGTCTCTACTAAAAATACAAAAAAATTAGCTGGGCGTGGTGGCGGGCACCTGTAGTC  
CCAGCTACTTGGGAGGCTGAGGCAGGAGAATGGCGTGAACCCAGGAGGTGGAGCTTG  
CAGTGAGCCAAGATCATGCCACTGCACTCCAGCCTGGGCAACAGAGCAAGACTCTGT  
CTCAAAAAAAATACATCTTAAATCTTACTGGGTAAATGCGATAATTAAATGAGCCAGT  
ACACAGAAAAGTGTTTTGTAAAATGTAATCAATATGATGCAGTTGATTTTTTTTAAAGCC  
ATTATTTTAAATGTAATTATTTTTATCATTTCTCTGTTTGACAGAAGGTGGCAGAGGTTA  
ACTTAATTACAGTGAAGTGTCCTTAGCGATAGAGATACATTCTGAGAAATATGATGGT  
AGTTGATATCATTATTATGCGAACATGGTAGAGTATACTTACACAAACCTGTATGGTTTA  
GCCTGCTACACTCTAGGCTGTATGGTATACCTTATTGCCCCTAGGCTGCAAACCTATACA  
GCATGTTACTGTACTGAATACTGTAGGCAGTTGAAGCACAGTGGTAAACATTGTGTATC  
TAAACATATCTAAACGTGGAAAAAGTACAATAAAAAATAGGATATTACAATCTCACAGGA  
CCATCATCCTATATGTGGTCTGTAACTGAAATGTCGTTTTGCAGCACATGACTTTATATA  
AATCAGCTGTTCTCTAGAACAGAGAACTTGATAAAATAACTTTAGATATTATGTTGTTTA  
GTTTTTGTTTGAATATGGATGAGACTAGTGAACAGTCTTAATATTATCTTTTGGTAAATTC  
AAAGGTTTAGATACATTTCTAACAACCTCGTATTTCTCAGTGTTGTCTTTTCTCCCCCAG  
CTCCTGGTACAGTTTGTTCAGAATACGTCCATCCCATTGGGACAGGGGCTTGTAAGAATC  
AGAAGCTAAAGATATTACTTGCTTGTCCTCCTTCCCGTGACTGAAGCCTCAGAATGCA  
GTCGGCTAATGTTACCAGGTAAAAATTAAGATCACTAGAAATAGGATAAAGAAGTCTTA  
AGAGCTTAGCCTACTCTATGTTACTGGTGGAATGAATATATCGTTTAATAACTGACTGGT  
GGAAACTGTAAAAATTAGGAGTCATGGAGAAAAAGCAACCATGAAATCATTAGTGCAT  
TGGTAGTTTAAGCCATAGGAATGGATATGATCACCCAGAGAGTGTGAGAGTGGGGAAA

AAAGGTCAGTGCAAAACTATGGAACCTCTTTATTTAAGGTACAGGGTAGGGCAGGAGAA  
CTTGTAAGGAGGGGAAGAAACAAAGACTAAAATAGTTGGATGAACATCAGCAGAGTG  
GAGGCATGAAACCCAGGAGAAATCATTGTATCAAATGCTACTGACAGGCCCAGTGAAA  
TAGGGACTAAAAGGACTCCATTATTGACTTTGGCAGAACCTGTTCCATGGAGAGAAGA  
GGATGGAAAGTCAGGCTGCAGTGACTTGAGTATACATACTTGCTTTTTTTTTTTTTTTTG  
AGATGGAGTGTCACTCTGTGCGCCAGGCTGGAGTGTAGTGACGCAATCTTGGCTCACT  
GCAACCTCCGCCTCCCCTCCCAGGTTCAAGCTATTCTCCTGCCTCAGCCTCCTAAGTAG  
CTGGGATTACAGGTGCGTGCCACTATGCCTGGCTAATTTTTGCATTTTATAGTAGAAACG  
GGTTTTACCATGTTGGCCAGGCTGGTCTTGAACCTCCTGACCTCCAGTGATCAGTCCG  
CCTTGGCCTCCCAAAGTGCTGAGATTACAGGCGTGAGCCACTGCGCCAGGCCTATCAA  
TACATACTTTCTAAAGTCTCTCCTGGTACGAGAAGGAAAAAGAGAAGGCGGTAAAGATA  
GAGGGAAATTTTTGTTTGTGTTAAGATCTGAGATATTTGAGGGTTGCTTTATGCTAAGG  
GGAAAGAACCAGTTAGAAAAGTTGAAGACAGGCCAGGTGTGGTGGCTCGTGCCTGTA  
ATCCCAGCACATTGGGAGGCTGAGGCAGGAGGATAGCTTGAGCCCAGGAGATTGAGA  
CCAGCCTGGGCAACATGGCGAGACCTCGTCTCTACAAAAAATTAAAAATTAGCTGGGC  
ATGGTGGTGTGCAGCTGTAGTCCCAGCTGAGGTGGGAAGATCACTTGAGCCCAGGAGT  
TTGAGGCTGCAGTAAGCTGTGATCACACCACTGTACTCCATCCTGGGTGGATAGAGCA  
ACACCCTGTCTAAAAGAAATAGTAATAAATTTAAAAAATATATGTATAAACAAACAATA  
ATTAAGGAAATGAAAACAACAGCGTTCATCTTCCCTTAGAATGACTGTTATCTTAAAGA  
TGGAAGATAACAAGTGTGTTGTTAAGGATATGGAGAAAAGGGAACCTTTGTACACTGTTG  
GTGGGAATGTAAGTTAGTACAGCCATTATGGAAACCGTATGGAAGTTCCTCAGAAAAAC  
TAAAAATGGAGCCACTATATGACCCAGCAATCTCACTTGTTAGGTATATATCCAAAGGAAT  
TGAAATCAGTAAGTCAAAGATGTCTATACTTACATGTTAATTGCAGCATTATTCACAATA  
ACCAAGATATGGAATCAGCTTTAGTGTTTCATCAACTAATGAATGCATTTAAAAAAAAT  
GCATTCACCTTCTTTTCCACATTTCTTTTAGTTTAAATTTTGATTTAAAGTATTTTAGACA  
TACAAGTATAGATAAAAGTAAATGAAAATCCAAATACTTGGCCTCCCAGCTCATAAAAC  
ACAATATTACAGGCCGGGCGTGGTGGCTCATGCCTATAATCCCAGCACTTTGGGAGGCC  
GAGGTGGGTGGATCACTTAAGGTCAGGAGTTTGAGACCAGCCTGGCTGGTGAAACCC  
TCTCTACTAAAAATGCAAAAGTTAACCAGGTGTGGTGGCACAGAAAAAATAACCGCAG  
CCTGAGATACAACCATAGGTAAAAAGGTAATGGCAAAAACCTGCAATAGCTTTTGCACC  
AACCTAATACAAAAGTTAAGGAGAGGGAGCTCTCTCCAGGAAAAAATAAAATGTAGATC  
CTATTCTTGAGTTAGTATTCATTGTATAGCTATATTTTTCAAGGAGAAAAGTACTGATTTCT  
GGCCTCAAAAAGGACTAAATTCTGTGATGTCCAAATGTTGAATGGTTGGTTATTCACCA  
ACCATTACTGCCAAGTGACAGAGAATTCTGTTCTCCTCACGTTTTGGCTGACTGCCTTTGG  
AACATAAAGCCATCTCTCTGTTCTTCTGTGAGACAAAGTTTTTATTTGTGTAATGAGAAT  
GCTGTCTGTTGCTATAAGGATGTTAGCTTCCAAGAGATGTTGGGTGCTGTGTATCAAAA  
TGGTGGGCTCCTAGAGATAGGTGCTACATAAAGCTGTGGTATTTCCCTTTACTAGATGA  
TACTACAAATCATTCTAACTCCTCCAAGGAGGTCCCTTCCTCAGCTGTTTTGAGAAGCC  
TTCGGGTGAATGTGGGTCCAGACGGAGAGGAGACGAGAGCTCAGACTGTACAGAAAT  
CCCCGGAGTTTTTGTCCACTTCAGAGTCTTCTAGCTTGTTGCAAGATCTACAGCCAAGT  
GATAGCACTTCTTTTATTCTTCTTAACCTAACAAGAGCAGGTATTCTTTCCTTTTTTTTGG



GCTCTGCTTATGCCTAAGAAAAAATTAGGGGTGGGGCATATTTAACTTAGTCATACTTA  
AAATAGAAAGAACCTTTATTATTTTATTATTTTGGAGAATTGGTGTGTCTGGTGACCATT  
TGAATATGTAGAGGGAGAGGGAGGACTCTAGTATGACTCATATCTTGTTTGGGAAATTA  
TGTAAGTCCATTTACTGAGATCGCACAGGAAGAGCAAGGCTTGGGGGAGGATGATTAG  
TTCCAATTTGCACCTATTTATGTTGAGATTTTGGAGGTATATTCAGGAGGACATGTCCTT  
TAGAGAGTTAGAAACATGAATCCAGAGTTCTAGAAAGGTCTGTTTTGGTGCTTATCAGC  
ATTCAGGAAACGTATGAAACAATGAACATGGATTCTAGAGAAGTCTCAAGCATAAACA  
GAAAAGAAGGCAAGTCTGGGACCCTGGGAAAAAACATTTAAGAGGACAACAGAACA  
GGAAGGAGCAGCTGGAAGGGGATGAAGAGAACTGGGAGAGAGTGGTAGCAGGGAAG  
CCAAGGGAGGAAGAAGTTTTTAAGGCAGAAAAGATACTAAATCATGCCAAATACTACAT  
GATGGGCTTATTAGTGAGAAGAAGTGTGTGTCTGGTGACCCTAGCAAGAGCAATTGTT  
ACTGTGGTAGCTGAGGTAGAGGCCAGGGTTAAAGAGATGGGGAGTGGATGGGAGGTA  
AGACAATAGATACACAAGTTAGAAGGTACACTTGTTCAAGAAGCTTGACTTTAAAGGA  
ACAGGGAAGAAGGTAAATAGCTAGAGAAGTACTTGGGGTTTTCTAATTCTTTTTAAAA  
ATAAGGGTGAGAGACTTGAGTTAGGACATATTTAAAGACATAAGGAAATGCTGGCCGA  
TAGAGAGGAACTAGTTGCAGATAGGAGAGAGGAGATAACACAAGTATATATGGGGGGA  
TAATTGAAGAATGAGAATGAAATACAGTAGGTGGGGATTAGTCTGGTTGACCAAGAAA  
GACAGCTTTGCCTTGAAACCAGAGGAGGCAAGGTAATGACAAGCCTGTAGACTAAAG  
GTAGAAAGATGATAGCCTGCTCTTCAGTGAGAAGTTTGAGGTAAAAGGCGAAGGTCA  
GGAATAGCTTATTTAGGACATGGAGAGTTTCTGGGCCAGGCGCAGTGGCTCACGCCTG  
TAATCCCACTACTTTGGGAGGCCGACGTGGGCGAATCACGAGGTTCAGGAGTTCAAGA  
CCAGCCTGACCAACATGGTGAAACCCCGTCTCTACTAAAAATACAAAAATTAGCCGGG  
CGTGGTGGTGCATGCCTGTAATCCCAGCTACTCAGGAGGCTGAGGCAGGAGAATCACT  
TGAACCTGGGAAGCGGAGGTTGCAGTAAGCCGAGATTGCGCCACTGCACTCCAGCCT  
GGGTGACAGAGCGAGACGCCGTCTCAAAAAAAAAAAAAAAAAAAGGGACATGGAGA  
GTCTCTGAGCCAGGGCAAATAAAAAGCTTGCTTGGTTTCTAACTTTTCATATATTTTGT  
TCTTCCAGGTCTGGGCTCTTCAGCTGAGCACTTAGTGTTTGTACAGGATGAGGCAGAA  
GATTCAGGGAATGATTTCTCTCCAGTGAGAGCACAGACAGTAGCATTCCATGGTTCT  
CCGGGTTTCAGGAGTTGGCCCATGACAGTTTGATTGCTGCTACTCGTGCACAACTGGCA  
AAGAATGCAAAAACCAGCAGCAATGGTGAGGCCCCGTGGCATTTCCTTGCCACTATT  
CTGTGCAAAGAGATTTTGGTAATGCAGTGGCTGGTTTGAGTTGTATATAATTTAAATTAT  
TCTATTGATGAGAGCAGAAGGCTAGAAATCTGTAAATTGTTTAAATTTTATTTTCTATAA  
AATAACTTGGTCATGCCAGATTTGTGTTCAAACCAACTAGTATTCTGAATTCTCAACTT  
TAAATAATGTACAGAGCCCCTTTTAAAGAAAAAATAATATACATCCTGGGGTTTGAATTG  
TTTTTATTGTAATGTCTCTTAAATATGCAAAAACATAAATTCTGTGTAAACTTCATATACT  
TAGA

**IRF1-3'UTR:**

CAGGGCCCCTGGGCCCCTCTTATTCCTCTAGGCAAGCAGGACCTGGCATCATGGTGGAT  
ATGGTGCAGAGAAGCTGGACTTCTGTGGGCCCCTCAACAGCCAAGTGTGACCCCACT  
GCCAAGTGGGGATGGGGCCTCCCTCCTTGGGTCATTGACCTCTCAGGGCCTGGCAGGC

CAGTGTCTGGGTTTTTCTTGTGGTGTAAGCTGGCCCTGCCTCCTGGGAAGATGAGGT  
TCTGAGACCAGTGTATCAGGTCAGGGACTTGGACAGGAGTCAGTGTCTGGCTTTTTCC  
TCTGAGCCCAGCTGCCTGGAGAGGGTCTCGCTGTCACTGGCTGGCTCCTAGGGGAACA  
GACCAGTGACCCCAGAAAAGCATAACACCAATCCCAGGGCTGGCTCTGCACTAAGAG  
AAAATTGCACTAAATGAATCTCGTTCCCAAAGAACTACCCCCTTTTCAGCTGAGCCCTG  
GGGACTGTTCCAAAGCCAGTGAAATGTGAAGGAAAGTGGGGTCCTTCGGGGCGATGC  
TCCCTCAGCCTCAGAGGAGCTCTACCCTGCTCCCTGCTTTGGCTGAGGGGCTTGGGAA  
AAAAACTTGGCACTTTTTTCGTGTGGATCTTGCCACATTTCTGATCAGAGGTGTACTA  
ACATTTCCCCCGAGCTCTTGGCCTTTGCATTTATTTATACAGTGCCTTGCTCGGCGCCCA  
CCACCCCCTCAAGCCCCAGCAGCCCTCAACAGGCCCAGGGAGGGAAGTGTGAGCGCC  
TTGGTATGACTTAAAATTGGAAATGTCATCTAACCATTAAGTCATGTGTGAACACATAA  
GGACGTGTGTAAATATGTACATTTGTCTTTTTTATAAAAAGTAAATTGTTTATAAGGGTG  
TGGCCTTTTTAGAGAGAAATTTAACTTGTAGATGATTTTACTTTTTATGGAAACACTGAT  
GGACTTATTATTGGCATCCCGCCTGAACTTGACTTTGGGGTGAACAGGGACATGCATCT  
ATTATAAAATCCTTTCGGCCAGGCGCGGTGGCTCACACCTGTAATCCCAGCACTTTGGG  
AGGCCGAGATGGGTGGATCACCTGAGGTCAGGAGTTCGAGACCAGCCTGGTGAAACT  
CCATTTCTACTAAAAATGCAAAAATTAGCTGGGCGTGTTGCGGGTGCTTGTAATCCCA  
GCTACTCAGGAGGCTGAGGCAAGAGAATCGCTTGAACCTGGGAGGTGGAGGTTGCAG  
TGAGCCGAGAACATGCCATTGCACTCCAGCCCGGGCACCAAAAAAAAAAAAAAAAAA  
AAAAAACCTTTCATTTGGCCGGGCATGGTGGCTTATGCCTGTAATCCTGGCACTTTGGG  
AGGCCAAGGTGGGCAGATCACCTGAGGTCAGGAGTTTGAGACCAGCCTGGCCAACAT  
GGTGAAACCTCATCTCTACTAAAAATACAAAATTAGGCCGGGCACGGTGGCTCACGC  
CTGTAATCCCAGCACTTTGGGAGGCAGAGGCGGGCGGATCACGAGGTCAGGAGATCA  
AGACCATCCTGGCTAACACGGTGAAACCCCGTCTCTACTAAAAATATAAAAAATTAGCC  
GGGCCTAGTGGCGGGTGCTGTAGTCCCAGCTACTCGGGAGGCTGAGGCAGGAGAAT  
GGCATGAACCCCGGAGGCAGAGCTTGCACTGAGCCGAGATTGCACCACTGCACTACA  
GCCTGGGCGACAGAGCGAGACTCCGTCTCAAAAAAAAAAAAAAAAAAATTAGCCGGGCC  
TGGTGGCGGGCGCCTGTAATCCCAGCTACTGTGGAGGCTGAAGCACAAGAATCACTTG  
AACCCGGGAGATGGAGGTTGCAGTGAGCTGAGACTGTGCCACTGCACTCCAGCCTGG  
GTGACAAGAGTGAGACTTTGTCTCAAAAAAAAAAAAAATCCTTTTGTATTATGTTACAT  
AGACAATGGCAGAAGGAGGGGACATTCCTGTCATAGGAACATGCTTATATAACATAGT  
CACCTGTCCTTGACTATCACCAGGGCTGTCAGTTGATTCTGGGCTCCTGGGGCCCAAG  
GAGTGTTAAGTTTTGAGGCATGTGCCATAGGTGATGTGTCCTGCTAACACACAGATGCT  
GCTCCAAAAAGTCAGTTGATATGACACAGTCACAGACAGAACAGTCAGCAGCCCAAG  
AAAGGTCCTCACGGCTGCTGTGCTGGGTAGCACTTGCCATCCAGTTTCTAGAGTGATG  
AAATGCTCTGTCTGTACCGTTCAATACAGTAGGCACTGGCACTAGCCACATGTGCCAGC  
TAAGCACTTGAAATGTGGCCAGTGCAATAAGGAATTGAACTTTTAATTGCATTTAATAA  
ACTGTATGTAAATAGTCA

**miR-302b-3p:**

UAAGUGCUUCCAUGUUUUAGUAG
